# Supplementary material
Source: Royal Society of Chemistry journal article supplement (https://www.rsc.org/suppdata/cc/1999/1033/901923e.doc)
Supplement: Supplementary file 1 [file 901923e.doc]

**Supplementary Information**

**for**

**Novel 1-Alkynyl Zirconium Porphyrin Complexes: Synthesis and Characterization of (por)Zr(1-C∫CR)3Li(THF) (por = octaethylporphyrinato (oep) and tetraphenylporphyrinato (tpp); R = Ph, SiMe3)**

**Hee-Joon Kim, Sungkyung Jung, You-Moon Jeon,**

**Dongmok Whang, Kimoon Kim***

*National Creative Research Initiative Center for Smart Supramolecules and Department of Chemistry, Pohang University of Science and Technology,*

*San 31 Hyojadong, Pohang 790-784, South Korea*

**Experimetal**

All chemicals were of reagent grade and were used without further purification except as noted below. Argon was purified by passage through successive columns of activated molecular sieves 13X (Aldrich) and Ridox (Fisher). All solvents were predried over activated molecular sieves (4 Å), and then distilled from their sodium benzophenone ketyl solutions (toluene and THF), or from CaH2 (pentane) under vacuum. CDCl3 and C6D6 were dried over CaH2, and purified by vacuum transfer. All solvents were degassed at least three times by freeze-pump-thaw cycles prior to use.

All manipulations of oxygen- and water-sensitive materials were performed in a glovebox under a nitrogen atmosphere. UV-visible spectra were recorded on an Hewlett-Packard 8542A spectrophotometer. 1H and 13C NMR spectra were obtained on a Bruker AM 300 spectrometer. Infrared spectra were recorded on a Bomem Michelson 100 or AIT Mattson Research Series spectrophotometer. Mass spectrometry and Elemental analysis were performed at Nebraska Center for Mass Spectrometry and Korea Basic Science Center, respectively.

*Synthesis of (OEP)Zr(1-C∫CPh)3Li(THF) (****1a****)*

To a suspension of (OEP)ZrCl2 (0.280 g, 0.40 mmol) in toluene (ca. 30 mL) was slowly added a THF solution (ca. 3 mL) of LiC∫CPh(0.132 g, 1.22 mmol). The reaction mixture was stirred at room temperature for 12 h and then filtered. The solvent was removed under reduced pressure to give **1a** as a dark red solid in 92 % yield. Analytically pure material was recrystallized from toluene/pentane. 1H NMR (C6D6): ** 10.67 (s, 4H, *meso*-H), 6.78 (m, 9H, *m, p*-Ph), 6.66 (d, 6H, *o*-Ph), 4.07 (m, 16H, *CH2*CH3), 2.14 (br, s, 4H, **-THF), 1.89 (t, 24H, CH2*CH3*), 0.15 (br, s, 4H, **-THF). 1H NMR (CDCl3): ** 10.43 (s, 4H, *meso*-H), 6.86 (t, 9H, *m, p*-Ph), 6.42 (d, 6H, *o*-Ph), 4.12 (m, 16H, *CH2*CH3), 2.78 (br, s, 4H, **-THF), 1.87 (t, 24H, CH2*CH3*), 1.09 (br, s, 4H, **-THF). 13C NMR (CDCl3): ** 147.9 (**-pyrrole), 142.4 (**-pyrrole), 131.3 (Ph), 127.4 (Ph), 127.6 (Ph), 126.2 (Zr-*C*∫C), 125.6 (Ph), 104.2 (Zr-C∫*C*), 102.2 (meso), 67.9 (**-THF), 24.8 (**-THF), 20.5 (CH2), 18.7 (CH3). IR (KBr, cm-1): ** 2066 (C∫C). UV-vis (toluene, nm): **max (log **) 400 (5.24), 532 (4.31), 568 (4.58). MS (FAB): *m*/*z* 933 ([M-THF]H+), 831 ([M-THF-C∫CPh]+). Anal. Calcd for C64H67N4OLiZr: C, 76.37; H, 6.72; N, 5.57. Found: C, 76.41; H, 6.36; N, 5.87 %.

*(OEP)Zr(1-C∫CSiMe3)3Li(THF) (****1b****)*

**1b** was synthesized in 83 % yield after recrystallization from pentane by the same procedure as for **1a** using LiC∫CSiMe3. 1H NMR (C6D6): ** 10.55 (s, 4H, *meso*-H), 4.24 (m, 8H, *CH2*CH3), 3.98 (m, 8H, *CH2*CH3), 2.70 (br, s, 4H, **-THF), 1.86 (t, 24H, CH2*CH3*), 0.72 (br, s, 4H, **-THF), -0.18 (s, 27H, Si(CH3)3). 13C NMR (C6D6): ** 164.8 (Zr-*C*∫C), 150.0 (**-pyrrole), 142.1 (**-pyrrole), 106.9 (Zr-C∫*C*), 102.4 (*meso*), 68.1 (**-THF), 29.9 (**-THF), 20.6 (CH2), 18.8 (CH3), 1.27 (Si(CH3)3). IR (KBr, cm-1): ** 2010 (C∫C). UV-vis (toluene, nm): **max (log **) 400 (5.32), 532 (4.03), 568 (4.37). MS (FAB): *m*/*z* 921 ([M-THF]H+), 823 ([M-THF-C∫CSiMe3]+)

*(TPP)Zr(1-C∫CPh)3Li(THF) (****2a****)*

**2a** was synthesized in 61 % yield after recrystallization from toluene/pentane by the same procedure as for **1a** using (TPP)ZrCl2 and LiC∫CPh. 1H NMR (CDCl3): ** 8.96 (s, 8H), 8.28 (s, 4H), 8.06 (s, 4H), 7.70-7.60 (m, 12H), 6.92 (m, 9H, -C∫CPh), 6.47 (m, 6H, -C∫CPh), 2.50 (s, 4H, THF), 0.85 (s, 4H, THF). 13C NMR (CDCl3): ** 150.8, 143.3, 135.7, 134.1, 132.1, 127.8 (-C∫CPh), 127.7, 126.8, 126.1 (-C∫CPh), 125.7 (Zr-C∫C), 125.4, 104.2 (Zr-C∫C), 67.9 (THF), 24.8 (THF). IR (KBr, cm-1): ** 2065 (C∫C). UV-vis (toluene, nm): **max (log **) 420 (6.09), 544 (3.81). MS (FAB): *m*/*z* 1013 ([M-THF]H+), 911 ([M-THF-C∫CPh]+)

*(TPP)Zr(1-C∫CSiMe3)3Li(THF) (****2b****)*

**2b** was synthesized in 72 % yield after recrystallization from toluene/pentane by the same procedure as for **1a** using (TPP)ZrCl2 and LiC∫CSiMe3. 1H NMR (CDCl3): ** 8.95 (s, 8H), 8.44 (s, 4H), 8.09 (s, 4H), 7.75 (m, 12H), 2.80 (s, 4H, THF), 1.29 (s, 4H, THF), -0.52 (s, 27H, Si(CH3)3). 13C NMR (CDCl3): ** 163.4 (Zr-*C*∫C), 150.4, 143.2, 135.5, 133.8, 132.1, 128.0, 127.0, 126.7, 124.9, 108.0 (Zr-C∫*C*), 68.1 (THF), 25.2 (THF), 0.9 (Si(CH3)3). IR (KBr, cm-1): ** 2008 (C∫C). UV-vis (toluene, nm): **max (log **) 420 (6.21), 544 (3.93). MS (FAB): *m*/*z* 1001 ([M-THF]H+), 903 ([M-THF-C∫CSiMe3]+)

*Reaction of* ***1a****-****2b*** *with anhydrous HCl.*

About 5 mg of **1a** was dissolved in C6D6 in a NMR tube capped with a rubber septum, and anhydrous HCl was bubbled into the solution for about 10 min. The conversion was nearly 100 %. The reaction for 1b-2b was similarly carried out. 1H NMR data for *H*2C=CPh(C∫CPh): ** 5.36 (d, *J* = 1.86 Hz, 1H), 5.28 (d, *J* = 1.86 Hz, 1H). 1H NMR data for (*E*)-Me3SiC*H*=C*H*C∫CSiMe3: ** 6.55 (d, *J* = 19 Hz, 1H), 6.01 (d, *J* = 19 Hz, 1H).

*X-ray Crystal Structure Determination of* ***1a****.*

X-ray quality crystals of **1a** were obtained by recrystallization from toluene/pentane. A crystal covered with Paratone-N hydrocarbon oil on a glass fiber was mounted on an Enraf-Nonius CAD4 diffractometer using graphite-monochromated Mo *K* radiation. Unit cell parameters were determined by least-squares refinement of 25 reflections. Crystallographic data is summarized in Table S1. Data collection was carried out at 188 K. The intensities of three standard reflections, measured every 3 h of X-ray exposure, showed no systematic changes. The intensity data were corrected for Lorentz and polarization effects. The structures were solved by direct methods (SHELXS86) and subsequent difference Fourier methods (SHELXL93) and refined by full-matrix least-squares methods. All non-hydrogen atoms (except for the phenyl groups) were refined anisotropically. Three phenylacetylides are disordered and three methyl carbons of the OEP ring are disordered in an apparently 50:50 ratio between up and down. However, disorders are not severe and refinment of the structure proceeded smoothly. The positions of hydrogen atoms were calculated (C-H = 0.95 Å) and were included as fixed contributions to the structure factor. Each hydrogen atom was assigned an isotropic thermal parameter 1.2 times that of the atom to which it is attached. The final cycle of refinement converged to the agreement indices given in Table S1.

Table S1.Crystallographic data and structure refinement for **1a**

Formula C64H67N4OLiZr

Formula weight 1006.38

Crystal system monoclinic

Space group *C*2/*c*  (No. 15)

*a* (Å) 19.265(6)

*b* (Å) 19.952(3)

*c* (Å) 28.991(12)

** (deg) 104.88(2)

*V* (Å3) 10769(6)

*Z* 8

Temperature (K) 188

*D*calc (g cm-3) 1.241

Radiation graphite-monochromated Mo *K*

((*K*) = 0.709 26 Å)

Scan mode **

Linear abs. coeff. (cm-1) 2.5

2** limits, deg 3.0 ≤ 2**≤ 44.0

No. of unique data 6593

No. of variables 705

*R*1 (*I >* 2**(*I*)) 0.0535

*R*2 (all data) 0.1331

Goodness-of-fit 1.039

*R*1 = (|*F*o| - |*F*c|)/|*F*o|. *R*2 = {[** (*F*o2 - *F*c2)2]/[** (*F*o2)2]}1/2;

** = 1/[2(*F*o2) + (0.1339P)2 + 12.7705P]; P = (*F*o2 + 2*F*c2)/3.
